# Supplementary material for: Effect of region-wide use of prehospital stroke triage scale on management of patients with acute stroke
Source: PubMed Central journal article supplement — J Neurointerv Surg. 2021 Aug 19;14(7):677–82. doi: 10.1136/neurintsurg-2021-017863 (PMC9209665; doi:10.1136/neurintsurg-2021-017863), 2021-08-19
Supplement: neurintsurg-2021-017863supp001.pdf [file neurintsurg-2021-017863supp001.pdf]

Supplemental material

Supplemental Figure 1. Triage system using the JUST score on a mobile device

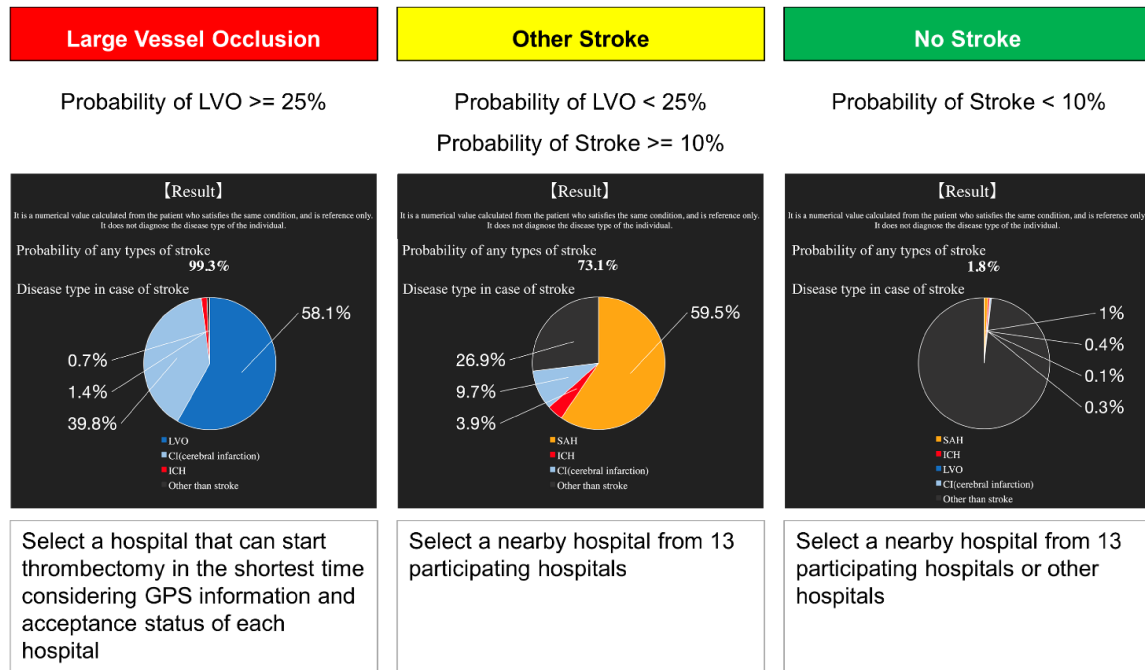

JUST: Japan Urgent Stroke Triage

Supplemental Figure 2. Participating hospitals in Hiroshima City

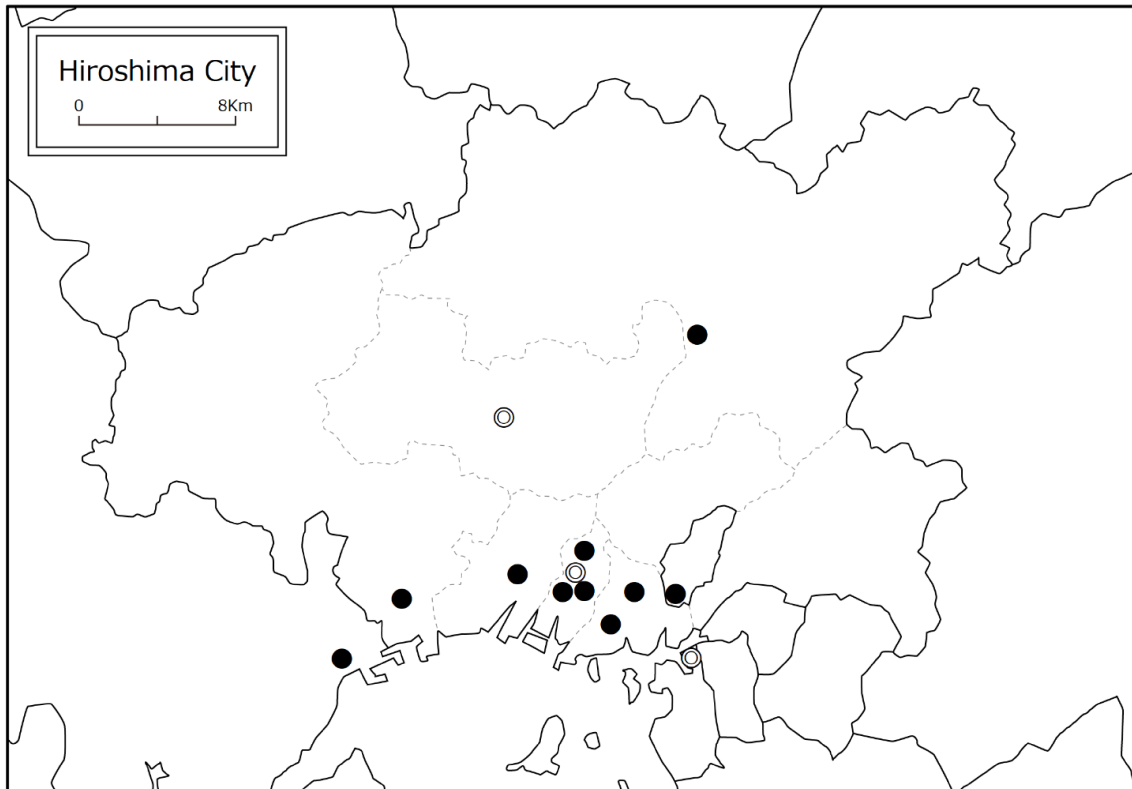

Black dot: Thrombectomy-capable hospitals

Double circle: rt-PA only hospitals

rt-PA: recombinant tissue plasminogen activator

Supplemental Table 1. Hiroshima City Fire Department

| <b>Fire Department</b> | <b>Sub-division</b>                                      |
|------------------------|----------------------------------------------------------|
| Naka                   | Ote; Hakushima; Motomachi; Eba                           |
| Higashi                | Hikari; Fukuda; Nukushina; Hesaka                        |
| Minami                 | Danbara; Sujjyo; Aosaki; Higashihonura; Ujina; Ninoshima |
| Nishi                  | Miyako; Misasa; Koi; Kogo; Inokuchi                      |
| Asaminami              | Sato; Kamiyasu; Gion; Numata                             |
| Asakita                | Nakashima; Kabe; Shiraki; Koyo; Asa; Akiota              |
| Aki                    | Kaita; Senogawa; Yano; Kumano; Saka                      |
| Saeki                  | Itsukaichi; Yuki; Yahata; Kairoen; Ishiuchi              |

Supplemental Table 2. Difference in patients who triaged and not triaged with JUST score after implementation of JUST score

|                                                                            | Triaged with<br>JUST score<br>(n=1484) | Not triaged with<br>JUST score<br>(n=922) | P Value  |
|----------------------------------------------------------------------------|----------------------------------------|-------------------------------------------|----------|
| <b>Total cohort (n=2406)</b>                                               |                                        |                                           |          |
| Age, years, mean (SD)                                                      | 72.4 (14.7)                            | 70.0 (19.3)                               | 0.0004   |
| Men, n (%)                                                                 | 828 (55.8)                             | 462 (50.1)                                | 0.007    |
| Systolic blood pressure, mmHg, mean (SD)                                   | 163.9 (33.1)                           | 152.6 (35.0)                              | < 0.0001 |
| Diastolic blood pressure, mmHg, mean (SD)                                  | 90.3 (21.7)                            | 84.7 (21.8)                               | < 0.0001 |
| Final diagnosis                                                            |                                        |                                           |          |
| LVO, n (%)                                                                 | 156 (10.5)                             | 30 (3.3)                                  |          |
| ICH, n (%)                                                                 | 305 (20.6)                             | 100 (10.9)                                |          |
| SAH, n (%)                                                                 | 65 (4.4)                               | 44 (4.8)                                  | < 0.0001 |
| CI, n (%)                                                                  | 465 (31.3)                             | 102 (11.1)                                |          |
| No stroke, n (%)                                                           | 493 (33.2)                             | 646 (70.1)                                |          |
| Success of the first request to hospital, n (%)                            | 1175 (79.2)                            | 742 (80.5)                                | 0.44     |
| On-scene time, min, median [IQR]                                           | 18 [14-22]                             | 17 [13-23]                                | 0.18     |
| Transport time, min, median [IQR]                                          | 10 [6-16]                              | 9 [6-14]                                  | 0.0002   |
|                                                                            | Triaged with<br>JUST score<br>(n=156)  | Not triaged with<br>JUST score<br>(n=30)  | P Value  |
| <b>Patients with LVO (n=186)</b>                                           |                                        |                                           |          |
| Age, years, mean (SD)                                                      | 79.0 (11.9)                            | 83.8 (10.3)                               | 0.04     |
| Men, n (%)                                                                 | 78 (50.0)                              | 8 (26.7)                                  | 0.02     |
| Systolic blood pressure, mmHg, mean (SD)                                   | 154.1 (27.5)                           | 153.3 (29.7)                              | 0.89     |
| Diastolic blood pressure, mmHg, mean (SD)                                  | 86.4 (22.1)                            | 80.1 (15.5)                               | 0.16     |
| mRS before onset, median [IQR]                                             | 0 [0-2]                                | 1 [0-3]                                   | 0.57     |
| NIHSS, median [IQR]                                                        | 20 [14-28]                             | 22 [15-28]                                | 0.71     |
| ASPECTS (CT or MRI), median [IQR]                                          | 7 [5-9]                                | 6 [3-8]                                   | 0.10     |
| Occlusion site                                                             |                                        |                                           |          |
| Anterior circulation, n (%)                                                | 147 (94.2)                             | 27 (90.0)                                 | 0.39     |
| Internal carotid artery or M1 segment of the middle cerebral artery, n (%) | 113 (72.4)                             | 17 (56.7)                                 | 0.08     |
| Success of the first request to hospital, n (%)                            | 127 (81.4)                             | 25 (83.3)                                 | 0.80     |
| On-scene time, min, median [IQR]                                           | 18 [14-22]                             | 16 [13-21]                                | 0.42     |
| Transport time, min, median [IQR]                                          | 11 [7-17]                              | 9 [6-14]                                  | 0.13     |
| Onset to door time, min, median [IQR]                                      | 96 [47-366]                            | 426 [156-1534]                            | 0.09     |

|                                            |               |             |       |
|--------------------------------------------|---------------|-------------|-------|
| Second transfer to another hospital, n (%) | 3 (1.6)       | 0 (0)       | 0.44  |
| rt-PA, n (%)                               | 49 (31.4)     | 3 (10.0)    | 0.02  |
| Thrombectomy, n (%)                        | 77 (49.4)     | 7 (23.3)    | 0.01  |
| D2P, min, median [IQR]                     | 72 [57-97]    | 95 [70-104] | 0.16  |
| P2R, min, median [IQR]                     | 44 [30-67]    | 69 [12-117] | 0.56  |
| TICI 2b/3, n (%)                           | 69/77 (89.6)  | 3/4 (75.0)  | 0.36  |
| mRS 0-2 at 90 days, n (%)                  | 59/153 (38.6) | 4/23 (17.4) | 0.048 |
| Death up to 90 days, n (%)                 | 22/153 (14.4) | 5/23 (21.7) | 0.36  |

JUST, Japan Urgent Stroke Triage; SD, standard deviation; IQR, interquartile range; LVO, large vessel occlusion; ICH, intracranial hemorrhage; SAH, subarachnoid hemorrhage; CI, cerebral infarction other than LVO; mRS, modified Rankin Scale; NIHSS, National Institutes of Health Stroke Scale; ASPECTS, Alberta Stroke Program Early CT Score; rt-PA, recombinant tissue plasminogen activator; D2P, door to puncture time; P2R, puncture to reperfusion time; TICI, thrombolysis in cerebral infarction; CT, computed tomography; MRI, magnetic resonance imaging
